# Supplementary material for: Unveiling the Ovarian Cell Characteristics and Molecular Mechanism of Prolificacy in Goats via Single-Nucleus Transcriptomics Data Analysis
Source: MDPI journal article supplement (doi:10.3390/cimb46030147), 2024-03-11
Supplement: s1 [file s1]

# Unveiling the Ovarian Cell Characteristics and Molecular Mechanism of Prolificacy in Goats via Single-Nucleus Transcriptomics Data Analysis

Supplementary materials

Table S1. Summary information of sample data identified by CellRanger

| Items                                           | Du'an 1  | Du'an 2   | Nubian 1   | Nubian 2 | Summary                                                               |               |
|-------------------------------------------------|----------|-----------|------------|----------|-----------------------------------------------------------------------|---------------|
| Estimated Number of cells                       | 9364     | 10893     | 16988      | 11087    | Post-Normalization Total Number of Reads                              | 1,886,222,998 |
| Fraction Reads in Cells                         | 71.00%   | 73.10%    | 70.50%     | 75.90%   | Pre-Normalization Total Number of Reads                               | 2,494,899,963 |
| Mean Reads per Cell                             | 75602    | 46043     | 39585      | 55285    | Pre-Normalization Mean Reads per Cell                                 | 51,620        |
| Median genes per Cell                           | 1140     | 1620      | 1321       | 1149     | Post-Normalization Mean Reads per Cell                                | 39,026        |
| Number of Readers                               | 70793619 | 501544385 | 6724716236 | 12949336 | Fraction of Reads Kept (Nubia1)                                       | 100.00%       |
| Valid Barcodes                                  | 98.30%   | 98.10%    | 98.40%     | 98.40%   | Fraction of Reads Kept (Nubia2)                                       | 68.40%        |
| Valid UMIs                                      | 99.90%   | 99.90%    | 99.90%     | 100.00%  | Fraction of Reads Kept (Duan2)                                        | 82.70%        |
| Sequencing Saturation                           | 85.30%   | 71.60%    | 74.50%     | 79.40%   | Fraction of Reads Kept (Duan1)                                        | 53.60%        |
| Q30 Bases in Barcode                            | 95.40%   | 95.60%    | 95.50%     | 95.50%   | Pre-Normalization Total Reads per Cell (Nubia1)                       | 39,585        |
| Q30 Bases in RNA Read                           | 89.50%   | 91.40%    | 90.10%     | 90.80%   | Pre-Normalization Total Reads per Cell (Nubia2)                       | 55,285        |
| Q30 Bases in UMI                                | 94.80%   | 94.10%    | 95%        | 95%      | Pre-Normalization Total Reads per Cell (Duan2)                        | 46,043        |
| Reads Mapped to Genomes                         | 88.50%   | 91.70%    | 90.90%     | 92%      | Pre-Normalization Total Reads per Cell (Duan1)                        | 75,602        |
| Reads Mapped Confidently to Genome              | 81.20%   | 84.60%    | 84.10%     | 94.80%   | Pre-Normalization Confidently Mapped Barcoded Reads per Cell (Nubia1) | 17,518        |
| Reads Mapped Confidently to Inter-genic Regions | 14.00%   | 14.10%    | 14.60%     | 10.00%   | Pre-Normalization Confidently Mapped Barcoded Reads per Cell (Nubia2) | 25,609        |
| Reads Mapped Confidently to Intronic Regions    | 0.00%    | 0.00%     | 0.00%      | 0.00%    | Pre-Normalization Confidently Mapped Barcoded Reads per Cell (Duan2)  | 21,171        |
| Reads Mapped Confidently to Exonic Regions      | 67.20%   | 70.50%    | 69.50%     | 74.80%   | Pre-Normalization Confidently Mapped Barcoded Reads per Cell (Duan1)  | 32,682        |
| Reads Mapped Confidently to Transcriptome       | 62.00%   | 64.00%    | 63.80%     | 62.40%   | Estimated Number of Cells                                             | 434,988       |

|                                |       |       |       |       |                            |        |
|--------------------------------|-------|-------|-------|-------|----------------------------|--------|
| Reads Mapped Antisense to Gene | 1.60% | 1.90% | 2.00% | 2.10% | Fraction Reads in Cells    | 72.40% |
| Total Genes Detected           | 20029 | 20710 | 20813 | 20775 | Median Genes per Cell      | 1,263  |
| Median UMI Counts per Cell     | 1926  | 3383  | 2400  | 2011  | Median UMI Counts per Cell | 2290   |

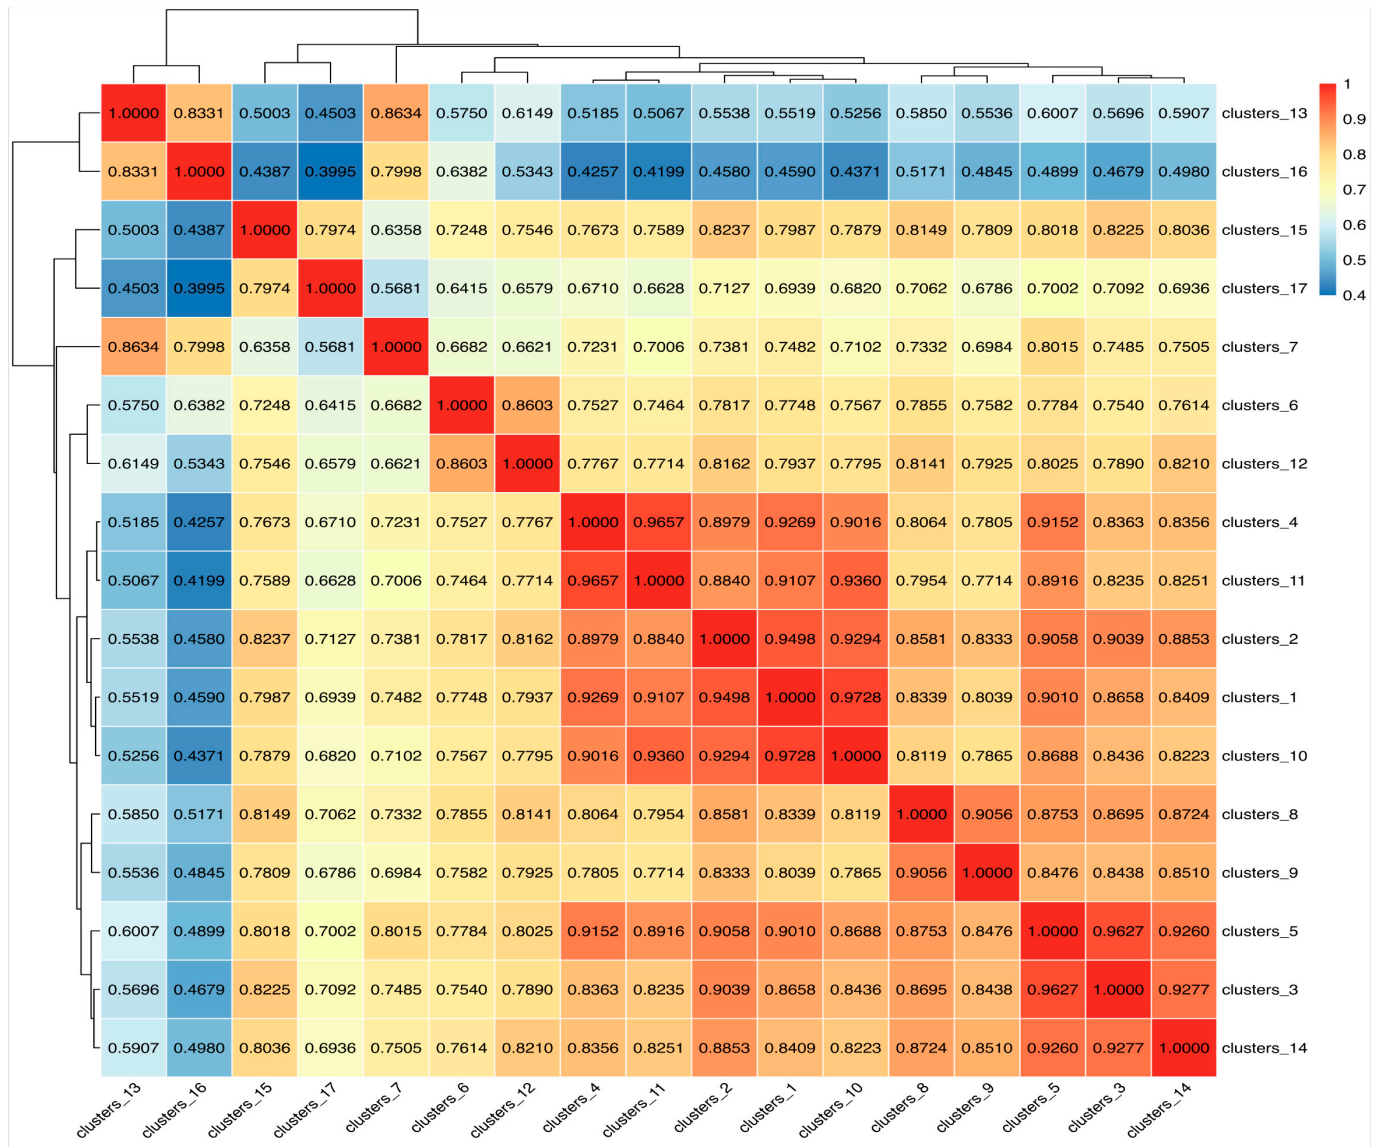

Figure S1. The cluster-to-cluster distance between the cells.

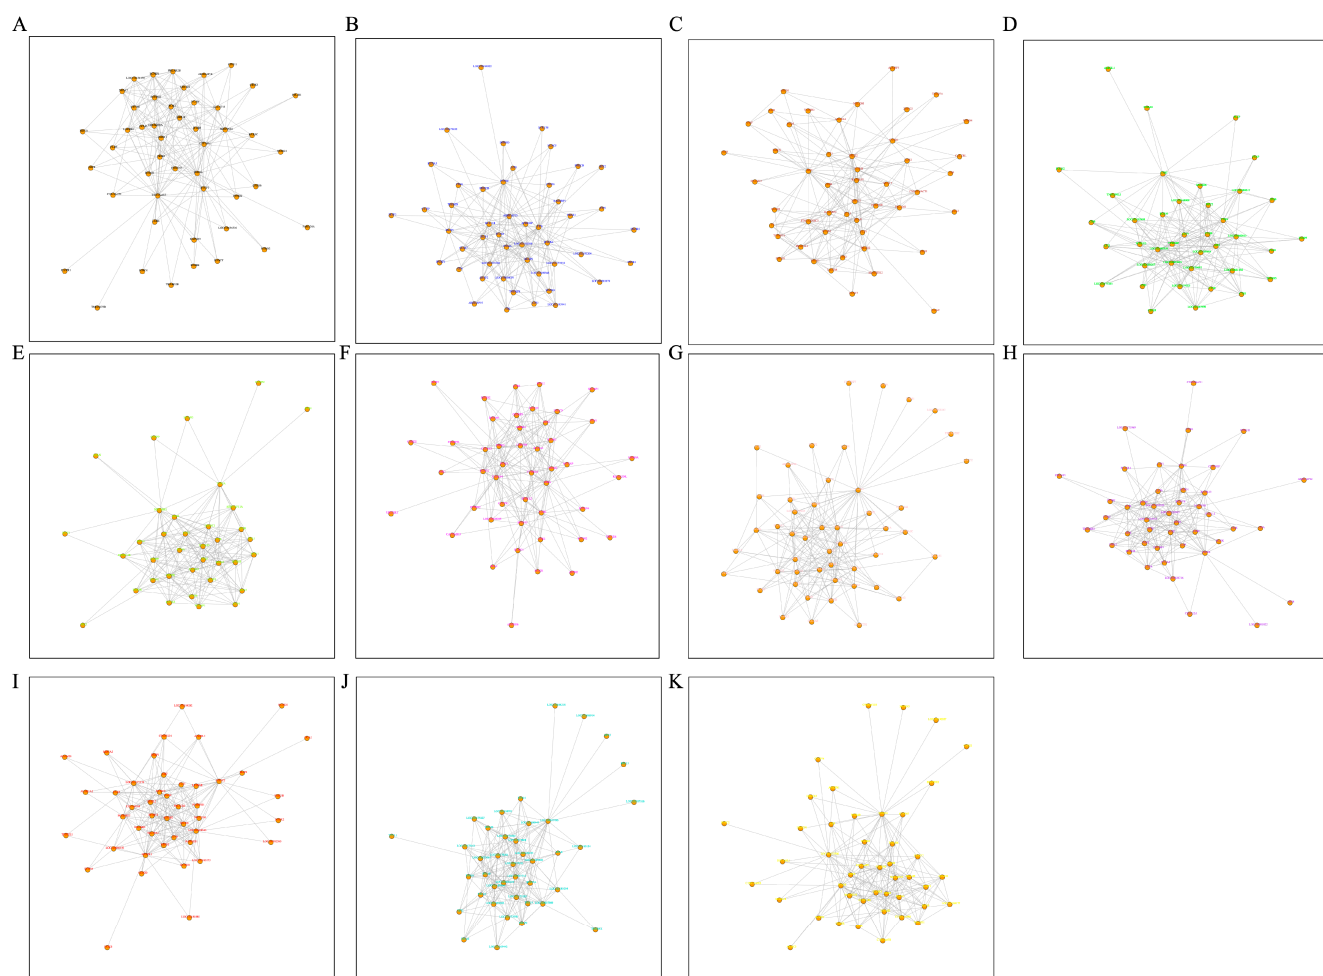

**Figure S2.** Hub network analysis of each module by WGCNA. **(a)** Black hub network—GCs. **(b)** Blue hub network—B cells. **(c)** Brown hub network— vascular endothelial cells. **(d)** Green hub network—Nature killer T cells. **(e)** Green-yellow hub network—Internal theca cells. **(f)** Magenta hub network—smooth muscle cells. **(g)** Pink hub network—Smooth muscle. **(h)** Purple hub network—Macrophage. **(i)** Red hub network—Stromal cells. **(j)** Turquoise hub network—External theca cells. **(k)** Yellow hub network—Germ cells.
